# Supplementary material for: Microneedle-assisted percutaneous delivery of methotrexate-loaded nanoparticles enabling sustained anti-inflammatory effects in psoriasis therapy
Source: Royal Society of Chemistry journal article supplement (doi:10.1039/d3tb02643d), 2024-01-01
Supplement: d3tb02643d1.pdf [file d3tb02643d1.pdf]

## Electronic Supplementary Information (ESI)

### Microneedles-assisted Percutaneous Delivery of Methotrexate-loaded Nanoparticles Enabling Sustained Anti-inflammatory Effects in Psoriasis Therapy

Hongyao Du,<sup>†a</sup> Jing Yang,<sup>†a</sup> Mo Li,<sup>b</sup> Yuting Xia,<sup>a</sup> Yan Li,<sup>a</sup> Jintao Zhu,<sup>b</sup> Lianbin Zhang,<sup>\*b</sup> and Juan Tao,<sup>\*a</sup>

<sup>a</sup> Hubei Engineering Research Center for Skin Repair and Theranostics, Department of Dermatology, Union Hospital, Tongji Medical College, Huazhong University of Science and Technology (HUST), Wuhan 430022, China. *E-mail*: tjhappy@126.com (J. T.)

<sup>b</sup> Key Laboratory of Material Chemistry for Energy Conversion and Storage (HUST), Ministry of Education, School of Chemistry and Chemical Engineering, HUST, Wuhan 430074, China. *E-mail*: zhanglianbin@hust.edu.cn (L. Z.)

<sup>†</sup> These authors contributed equally to this work

#### Table of Contents

|                                                                       |    |
|-----------------------------------------------------------------------|----|
| 1. Particle size distribution of MTX@HMSN/CS                          | S2 |
| 2. <i>In vivo</i> anti-inflammatory effects of MTX@HMSN/CS-loaded MNs | S3 |
| 3. Safety evaluation of MTX@HMSN/CS-loaded MNs                        | S4 |

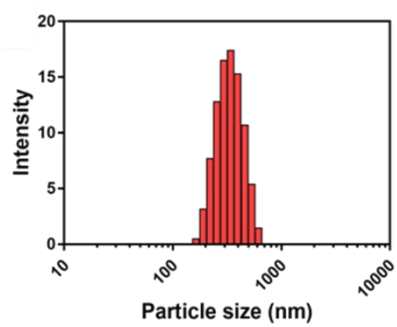

**Figure S1.** Particle size distribution of MTX@HMSN/CS.

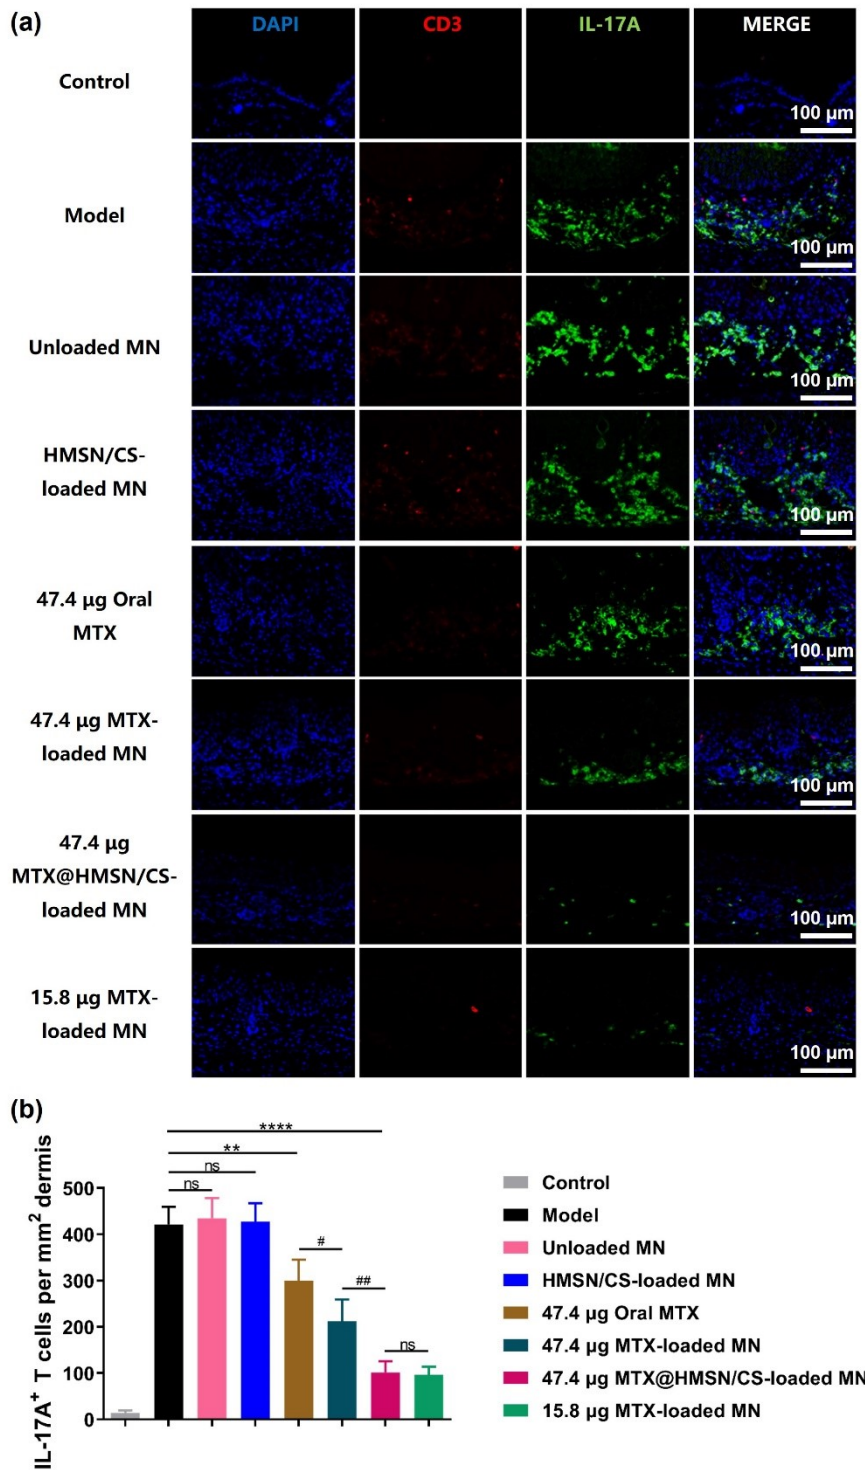

**Figure S2.** *In vivo* anti-inflammatory effects of MTX@HMSN/CS-loaded MNs. (a) CD3 and IL-17A immunofluorescent staining of mice left ear skin sections on day 10. The scale bars in the last images can be applied to the others in the same line. (b) Quantitative analysis of the counts of IL-17A<sup>+</sup> T cells in mice left ear skin on day 10. Data are presented as the mean  $\pm$  SD (n=5) (ns,  $p > 0.05$ ; \*\*,  $p < 0.01$ ; \*\*\*\*,  $p < 0.0001$ ; #,  $p < 0.05$ ; ##,  $p < 0.01$ ).

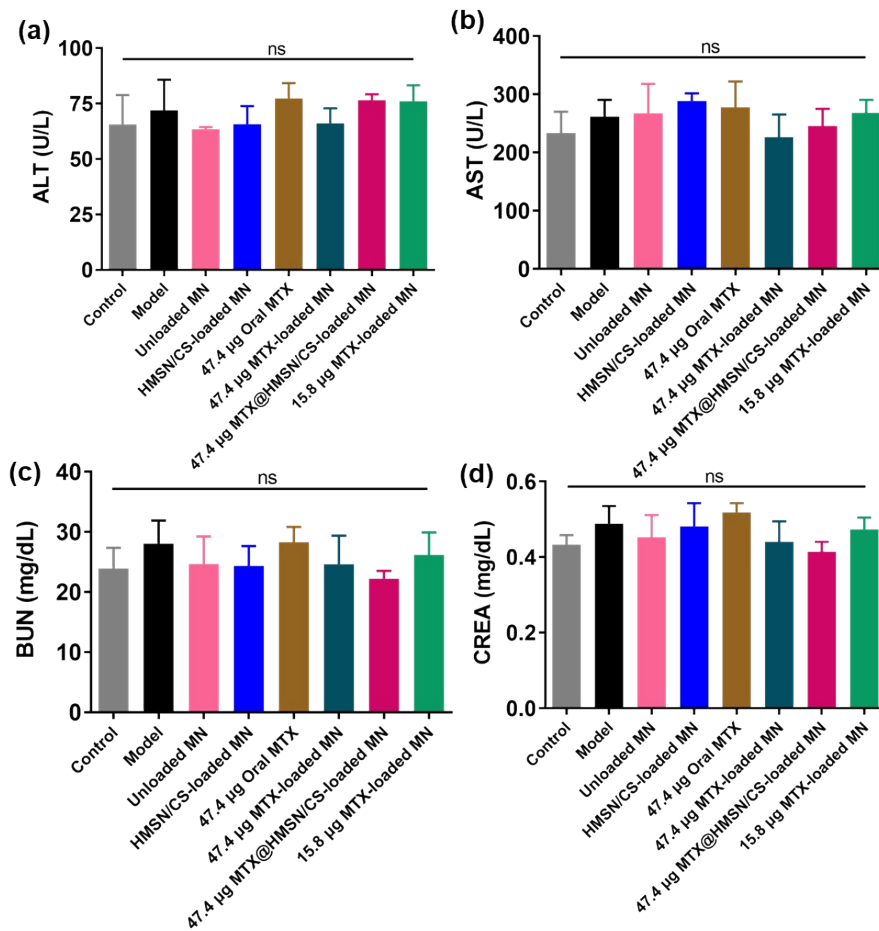

**Figure S3.** Safety evaluation of MTX@HMSN/CS-loaded MNs. Liver and renal function tests of mice in different groups. Serum levels of (a) ALT, (b) AST, (c) BUN, and (d) CREA. Data are presented as the mean  $\pm$  SD (n=5) (ns,  $p > 0.05$ ).
